# Supplementary material
Source: PubMed Central journal article supplement (PMC4167972)
Supplement: NIHMS597487-supplement-eAppendix.pdf [file NIHMS597487-supplement-eAppendix.pdf]

# Safety Assessment: Frontline Perspectives from this NICU

Please circle the following items with respect to your NICU using the scale below:

| A                 | B                 | C       | D              | E              | X              |
|-------------------|-------------------|---------|----------------|----------------|----------------|
| Disagree Strongly | Disagree Slightly | Neutral | Agree Slightly | Agree Strongly | Not Applicable |

|                                                                                                                     |           |   |   |   |   |   |   |           |   |   |   |   |   |   |
|---------------------------------------------------------------------------------------------------------------------|-----------|---|---|---|---|---|---|-----------|---|---|---|---|---|---|
| 1. Nurse input is well received in this NICU.                                                                       | A         | B | C | D | E | X |   |           |   |   |   |   |   |   |
| 2. In this NICU, it is difficult to speak up if I perceive a problem with patient care.                             | A         | B | C | D | E | X |   |           |   |   |   |   |   |   |
| 3. Disagreements in this NICU are appropriately resolved (i.e., not who is right but what is best for the patient). | A         | B | C | D | E | X |   |           |   |   |   |   |   |   |
| 4. I have the support I need from others in this NICU to care for patients.                                         | A         | B | C | D | E | X |   |           |   |   |   |   |   |   |
| 5. It is easy for personnel here to ask questions when there is something that they do not understand.              | A         | B | C | D | E | X |   |           |   |   |   |   |   |   |
| 6. The physicians and nurses here work together as a well-coordinated team.                                         | A         | B | C | D | E | X |   |           |   |   |   |   |   |   |
| 7. I would feel safe being treated here as a patient.                                                               | A         | B | C | D | E | X |   |           |   |   |   |   |   |   |
| 8. Medical errors are handled appropriately in this NICU.                                                           | A         | B | C | D | E | X |   |           |   |   |   |   |   |   |
| 9. I know the proper channels to direct questions regarding patient safety in this NICU.                            | A         | B | C | D | E | X |   |           |   |   |   |   |   |   |
| 10. I receive appropriate feedback about my performance.                                                            | A         | B | C | D | E | X |   |           |   |   |   |   |   |   |
| 11. In this NICU, it is difficult to discuss errors.                                                                | A         | B | C | D | E | X |   |           |   |   |   |   |   |   |
| 12. I am encouraged by others in this NICU, to report any patient safety concerns I may have.                       | A         | B | C | D | E | X |   |           |   |   |   |   |   |   |
| 13. The culture in this NICU makes it easy to learn from the errors of others.                                      | A         | B | C | D | E | X |   |           |   |   |   |   |   |   |
| 14. My suggestions about safety would be acted upon if I expressed them to management.                              | A         | B | C | D | E | X |   |           |   |   |   |   |   |   |
| 15. I like my job.                                                                                                  | A         | B | C | D | E | X |   |           |   |   |   |   |   |   |
| 16. Working here is like being part of a large family.                                                              | A         | B | C | D | E | X |   |           |   |   |   |   |   |   |
| 17. This NICU is a good place to work.                                                                              | A         | B | C | D | E | X |   |           |   |   |   |   |   |   |
| 18. I am proud to work in this NICU.                                                                                | A         | B | C | D | E | X |   |           |   |   |   |   |   |   |
| 19. Morale in this NICU is high.                                                                                    | A         | B | C | D | E | X |   |           |   |   |   |   |   |   |
| 20. When my workload becomes excessive, my performance is impaired.                                                 | A         | B | C | D | E | X |   |           |   |   |   |   |   |   |
| 21. I am less effective at work when fatigued.                                                                      | A         | B | C | D | E | X |   |           |   |   |   |   |   |   |
| 22. I am more likely to make errors in tense or hostile situations.                                                 | A         | B | C | D | E | X |   |           |   |   |   |   |   |   |
| 23. Fatigue impairs my performance during emergency situations. (e.g. emergency resuscitation, seizure)             | A         | B | C | D | E | X |   |           |   |   |   |   |   |   |
| 24. Management supports my daily efforts:                                                                           | Unit Mgmt | A | B | C | D | E | X | Hosp Mgmt | A | B | C | D | E | X |
| 25. Management doesn't knowingly compromise patient safety:                                                         | Unit Mgmt | A | B | C | D | E | X | Hosp Mgmt | A | B | C | D | E | X |
| 26. Management is doing a good job:                                                                                 | Unit Mgmt | A | B | C | D | E | X | Hosp Mgmt | A | B | C | D | E | X |
| 27. Problem personnel are dealt with constructively by our:                                                         | Unit Mgmt | A | B | C | D | E | X | Hosp Mgmt | A | B | C | D | E | X |
| 28. I get adequate, timely info about events that might affect my work, from:                                       | Unit Mgmt | A | B | C | D | E | X | Hosp Mgmt | A | B | C | D | E | X |
| 29. The staffing levels in this NICU are sufficient to handle the number of patients.                               | A         | B | C | D | E | X |   |           |   |   |   |   |   |   |
| 30. This hospital does a good job of training new personnel.                                                        | A         | B | C | D | E | X |   |           |   |   |   |   |   |   |
| 31. All the necessary information for diagnostic and therapeutic decisions is routinely available to me.            | A         | B | C | D | E | X |   |           |   |   |   |   |   |   |
| 32. Trainees in my discipline are adequately supervised.                                                            | A         | B | C | D | E | X |   |           |   |   |   |   |   |   |
| 33. I feel fatigued when I get up in the morning and have to face another day on the job.                           | A         | B | C | D | E | X |   |           |   |   |   |   |   |   |
| 34. I feel burned out from my work.                                                                                 | A         | B | C | D | E | X |   |           |   |   |   |   |   |   |
| 35. I feel frustrated by my job.                                                                                    | A         | B | C | D | E | X |   |           |   |   |   |   |   |   |
| 36. I feel I am working too hard on my job.                                                                         | A         | B | C | D | E | X |   |           |   |   |   |   |   |   |
| 37. People support one another in this NICU.                                                                        | A         | B | C | D | E | X |   |           |   |   |   |   |   |   |
| 38. When a lot of work needs to be done quickly, we work together as a team to get the work done.                   | A         | B | C | D | E | X |   |           |   |   |   |   |   |   |
| 39. In this unit, people treat each other with respect.                                                             | A         | B | C | D | E | X |   |           |   |   |   |   |   |   |
| 40. When one area in this NICU gets really busy, others help out.                                                   | A         | B | C | D | E | X |   |           |   |   |   |   |   |   |
| 41. Staff will freely speak up if they see something that may negatively affect patient care.                       | A         | B | C | D | E | X |   |           |   |   |   |   |   |   |
| 42. Staff feel free to question the decisions or actions of those with more authority.                              | A         | B | C | D | E | X |   |           |   |   |   |   |   |   |
| 43. Staff are afraid to ask questions when something does not seem right.                                           | A         | B | C | D | E | X |   |           |   |   |   |   |   |   |
| 44. We are given feedback about changes put into place based on event reports.                                      | A         | B | C | D | E | X |   |           |   |   |   |   |   |   |
| 45. We are informed about errors that happen in this NICU.                                                          | A         | B | C | D | E | X |   |           |   |   |   |   |   |   |
| 46. In this NICU, we discuss ways to prevent errors from happening again.                                           | A         | B | C | D | E | X |   |           |   |   |   |   |   |   |
| 47. Patient safety is never sacrificed to get more work done.                                                       | A         | B | C | D | E | X |   |           |   |   |   |   |   |   |
| 48. Our procedures and systems are good at preventing errors from happening.                                        | A         | B | C | D | E | X |   |           |   |   |   |   |   |   |

Turn Over

Turn Over

Turn Over

|                                                                                                                               |   |   |   |   |   |   |
|-------------------------------------------------------------------------------------------------------------------------------|---|---|---|---|---|---|
| 49. It is just by chance that more serious mistakes don't happen around here.                                                 | A | B | C | D | E | X |
| 50. We have patient safety problems in this NICU.                                                                             | A | B | C | D | E | X |
| 51. In this NICU leaders are skilled in quality improvement (QI)                                                              | A | B | C | D | E | X |
| 52. In this NICU leaders personally facilitate QI projects                                                                    | A | B | C | D | E | X |
| 53. This NICU values teamwork, communication, and a commitment to quality improvement                                         | A | B | C | D | E | X |
| 54. NICU staff are facile with using QI methods for change                                                                    | A | B | C | D | E | X |
| 55. NICU staff have a strong desire to improve performance                                                                    | A | B | C | D | E | X |
| 56. In this NICU QI teams are diverse with respect to professional discipline, personality, and perspective                   | A | B | C | D | E | X |
| 57. Physicians are active members of our QI teams                                                                             | A | B | C | D | E | X |
| 58. This NICU has worked on collaborative QI projects before                                                                  | A | B | C | D | E | X |
| 59. The values of this organization support staff in pursuing QI                                                              | A | B | C | D | E | X |
| 60. This organization's QI program is highly developed                                                                        | A | B | C | D | E | X |
| 61. An extensive system exists to collect, manage, and facilitate the use of data to support QI                               | A | B | C | D | E | X |
| 62. Our information systems provided useful data to help us meet our aims in this collaborative                               | A | B | C | D | E | X |
| 63. Our NICU QI teams have sufficient resources (support services, computer access, data management)                          | A | B | C | D | E | X |
| 64. In this organization staff are given education and training in how to identify and act on QI opportunities                | A | B | C | D | E | X |
| 65. In this organization staff are given education and training in statistical and other quantitative methods that support QI | A | B | C | D | E | X |
| 66. In this organization staff are given the needed education and training to improve job skills and performance              | A | B | C | D | E | X |
| 67. In this organization staff are rewarded and recognized (e.g. financially and/or otherwise) for improving quality          | A | B | C | D | E | X |

**Please fill in the circles**

68. Does this NICU use Patient Safety Leadership WalkRounds to discuss with senior leaders any issues that could harm patients or undermine the safe delivery of care?:  Yes  No  Not Sure

69. How often did you participate?  0  1  2  3-4  5-7  8 or more  Not Sure

70. Did you receive feedback about patient safety risks that were reduced as a result of WalkRounds?  Yes  No  Not Sure

**Background Information**

Have you completed this survey before (circle one)? Yes / No / Don't Know

Gender: Male                      Female

Primarily: Adult                      Peds                      Both

Typical Shift: Days / Evenings / Nights / Variable

**Position: (mark only one)**

- MD
- Fellow Physician
- Neonatal Nurse Practitioner
- Registered Nurse
- Respiratory Care Practitioner
- Other: \_\_\_\_\_

**Years in Specialty:** Less than 6 months    6 to 11 mos.    1 to 2 years    3 to 4 years    5 to 10 years    11 to 20 years    21 years or more

**Thank you for completing the survey – your time and participation are greatly appreciated.**
